# 1 Evolution of transmission mode in conditional 2 mutualisms with spatial variation in symbiont 3 quality

4 Alexandra Brown and Erol Akçay  
5 Department of Biology  
6 University of Pennsylvania

7 May 4, 2018

## 8 **Abstract**

9 While some symbioses are always mutualistic or parasitic, others have costs and  
10 benefits that depend on environmental factors. The environmental context may itself  
11 vary in space, in some cases causing a symbiont to be a mutualist in one location and a  
12 parasite in another. Such spatially conditional mutualisms pose a dilemma for hosts,  
13 who might evolve (higher or lower) horizontal or vertical transmission to increase their  
14 chances of being infected only where the symbiont is beneficial. To determine how  
15 transmission in hosts might evolve, we modeled transmission evolution where the  
16 symbiont had a spatially conditional effect on either host lifespan or fecundity. We  
17 found that over ecological time, symbionts that affected lifespan but not fecundity led  
18 to high frequencies of infected hosts in areas where the symbiont was beneficial and  
19 low frequencies elsewhere. In response, hosts evolved increased horizontal transmis-  
20 sion only when the symbiont affected lifespan. We also modeled transmission evolu-  
21 tion in symbionts, which evolved high horizontal and vertical transmission, indicating  
22 a possible host-symbiont conflict over transmission mode. Our results suggest an eco-  
23 evolutionary feedback where the component of host fitness that a conditionally mutu-  
alistic symbiont influences affects its distribution in the population, and, through this,  
the transmission mode that evolves.

## 24 Key words

25 “Conditional mutualism”, “context-dependent”, “symbiosis”, “transmission mode”, “spa-  
26 tial variation”

## 27 1 Introduction

28 Most, if not all, multicellular organisms live in symbiosis with other species. While some  
29 symbioses are always mutualistic or parasitic, many others have costs and benefits that  
30 are context-dependent (Chamberlain et al., 2014; Daskin and Alford, 2012; Thomas et al.,  
31 2000). We call these interactions conditional mutualisms. Symbiont effects may vary based  
32 on abiotic factors (e.g. nutrient availability (Cheplick et al., 1989) or temperature (Baker  
33 et al., 2013)) or biotic factors (e.g. the presence of a third species which parasitizes the host  
34 (Smith, 1968)). The abiotic or biotic context may in turn vary in space. In some cases, the  
35 symbiont may change from a mutualist to a parasite depending on the location. For exam-  
36 ple, the endophytic fungus *Epichloë coenophiala* increases the biomass of tall fescue (*Festuca*  
37 *arundinacea*) seedlings in nutrient-rich soil, while decreasing host biomass in nutrient-poor  
38 soils (Cheplick et al., 1989). Different temperatures produce a similar pattern in the nutri-  
39 ents provided by the *Symbiodinium* endosymbionts of corals. Clade D members of *Symbio-*  
40 *dinium* provide less nitrogen than Clade C symbionts except at high temperatures, where  
41 they provide equivalent nitrogen and more carbon (this pattern is thought to explain the  
42 geographic distribution of Clade C and Clade D symbioses) (Baker et al., 2013).

43 Such spatially conditional mutualisms pose a dilemma for hosts in deciding how to ac-  
44 quire their symbionts. In general, assuming no correlation between horizontal and vertical  
45 transmission, hosts are predicted to evolve reduced vertical (parent-to-offspring) trans-  
46 mission of parasites and increased vertical transmission of mutualists (Yamamura, 1993).  
47 Hosts may also evolve decreased susceptibility to horizontal transmission of parasites, in-  
48 cluding when resistance comes at a cost to fecundity, if reproduction is local (Best et al.,

49 2011). Hosts may even evolve decreased horizontal transmission of parasites to others in  
50 a spatially structured population (Débarre et al., 2012). However, hosts in spatially con-  
51 ditional mutualisms have to deal with a symbiont that is both a mutualist and a parasite,  
52 and it is not clear whether horizontal transmission, vertical transmission, both, or neither  
53 will evolve in conditional mutualisms. Furthermore, symbionts as well as hosts may show  
54 genetic variation that affects the two rates of transmission (Ebert, 2013). There may thus  
55 be host-symbiont conflict over transmission mode, which may also influence transmission  
56 evolution.

57 Which transmission mode evolves is an important question, since transmission mode  
58 itself, regardless of whether it arises through host or symbiont evolution, influences sym-  
59 biont spread and the evolution of symbiont costs and benefits. Horizontal transmission  
60 is predicted to select for more parasitic symbionts, and vertical transmission for more  
61 mutualistic ones (Alizon et al., 2009; Ewald, 1987), in the absence of feedbacks select-  
62 ing for mutualism (Akçay, 2015; Shapiro and Turner, 2014) or parasitism Werren et al.  
63 (2008). Furthermore, research on the impact of spatial variation on parasitism shows that  
64 spatial heterogeneity can have a large influence on the virulence and spread of parasites  
65 (Carlsson-Granér and Thrall, 2015; Gibson et al., 2016; Jousimo et al., 2014; Lively, 2006;  
66 Penczykowski et al., 2014; Real and Biek, 2007; Saeki and Sasaki, 2018; Thrall and Burdon,  
67 2000). While studies of spatial heterogeneity in parasitism have generally focused on spa-  
68 tial variation in host or parasite traits, distribution, or transmission (but see (Krist et al.,  
69 2004; Tellier and Brown, 2011), which include environmental effects on the costs of infec-  
70 tion), they suggest that spatial heterogeneity can have an important impact on symbioses.  
71 Understanding transmission mode evolution in hosts and symbionts in spatially condi-  
72 tional mutualisms may thus give insight into both potential host-symbiont conflict as well  
73 the future distribution and virulence of the symbiont.

74 We model transmission mode evolution in a spatially conditional mutualism over a  
75 range of newborn host dispersal rates. We consider two different types of spatially condi-

76 tional mutualisms that affect different components of host fitness. In the first conditional  
77 mutualism, the symbiont affects host lifespan, and in the second the symbiont affects host  
78 fecundity (modeled as chance of reproduction per unit time). We split symbiont effects  
79 into these components partly because they lead to significantly different evolutionary pre-  
80 dictions, and partly because it is possible that a symbiont may have a strong effect on  
81 one component but not the other. For example, symbioses that are involved only with  
82 reproduction, like plant-pollinator/seed parasite relationships will influence host fecun-  
83 dity without affecting lifespan. On the other hand, symbioses involved with, for example,  
84 juvenile survival (as in the interaction between jellyfish and the juvenile scads they protect  
85 from predators) affect lifespan without having any influence on the reproductive output of  
86 hosts who survive to adulthood (Bonaldo et al., 2004). (We also consider several examples  
87 of conditional mutualisms affecting host lifespan and fecundity in the supplement.) To  
88 determine whether there is host-symbiont conflict over transmission, we model transmis-  
89 sion mode evolution under host and symbiont control separately. We infer the possibility  
90 of conflict if hosts evolve one transmission rate and symbionts evolve another.

91 Intuitively, we may predict that when a host is likely to stay in the same location as  
92 its parent, vertical transmission may be a good strategy to ensure an advantageous in-  
93 fection status (i.e. infection where the symbiont is beneficial and lack of infection where  
94 the symbiont is harmful). Conversely, when hosts often disperse from their natal patch,  
95 they might instead rely on horizontal transmission from their new neighbors to acquire  
96 the symbiont where it is beneficial. However, horizontal transmission will only confer the  
97 “right” infection status when a host’s neighbors are infected where the symbiont is a mu-  
98 tualist and uninfected where the symbiont is a parasite. Thus, hosts should only evolve  
99 horizontal transmission when the distribution of infected hosts matches the spatial distri-  
100 bution of symbiont effects. As the distribution of infected hosts is itself influenced by the  
101 the transmission rates, the evolution of the transmission mode is fundamentally governed  
102 by an eco-evolutionary feedback (see Figure 1).

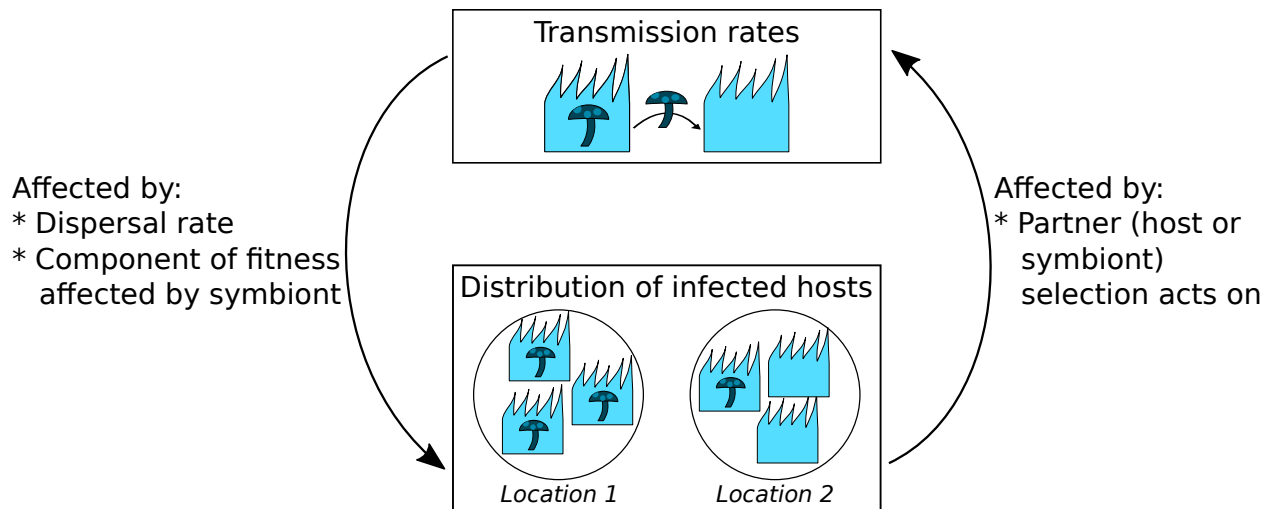

Figure 1: The evolution of transmission is governed by an eco-evolutionary feedback. The spatial distribution of infected hosts (bottom) affects the selective advantage of a mutant with a different transmission rate. As a mutant spreads, its transmission rates in turn influence the spatial distribution of infected hosts. The feedback from the spatial distribution to the transmission rates is influenced by the dispersal rate and the component of host fitness the symbiont affects. Similarly, the selective advantage of a mutant with new transmission rates is influenced by whether selection acts on the hosts or the symbiont, as different distributions of infected hosts are beneficial to them.

103 This eco-evolutionary feedback suggests that the evolution of transmission mode might  
104 ultimately depend on which life history stage is affected by the symbiont through the fit-  
105 ness component's influence on the distribution of infected hosts. Accordingly, we find  
106 that when the symbiont affects host lifespan, a distribution of infected hosts that reflects  
107 the distribution of symbionts effects is produced at high horizontal transmission rates.  
108 This allows hosts evolve to high horizontal transmission rates. On the other hand, when  
109 the symbiont affects host fecundity, high horizontal transmission leads to high fractions  
110 of infected hosts in both patches. In this case, hosts generally evolve low horizontal trans-  
111 mission rates. Regardless of the type of symbiont effect, low host dispersal rates allow  
112 hosts with high vertical and low horizontal transmission rates to have high frequencies  
113 of infected hosts in locations where the symbiont is mutualistic and low frequencies else-  
114 where. This allows high vertical transmission to evolve at low but not high dispersal rates.  
115 Our results highlight how ecological feedback from the fraction of infected hosts gener-

116 ated by the current transmission rates affects the selective advantage of mutant transmis-  
117 sion rates, determining the course of evolution. This suggests that the manner in which  
118 the symbiont affects host life history and ecology ultimately influences host evolution and  
119 the ecological dynamics hosts evolve toward.

## 120 **2 Methods**

121 We first describe the model in general, then discuss the methods for the analytical and  
122 simulation models.

### 123 **2.1 The Model**

124 We model a patch-structured population where the symbiont is beneficial in half the patches  
125 (M-patches) and harmful in the other half (P-patches). We consider two types of condi-  
126 tional mutualism: one where the symbiont affects host fecundity and the other where it  
127 affects host lifespan. In the main text, we show results from the case where the symbiont  
128 affects host lifespan through the newborn host's establishment probability. This is almost  
129 identical to the case where the symbiont affects lifespan through adult host mortality,  
130 which we show in the supplement, Figure S2. We analytically model the case where there  
131 are two patches of infinite size. For tractability in our analytical model, the ecological and  
132 evolutionary dynamics occur on separate timescales. We use simulations to investigate  
133 the effects of finite populations and concurrent ecological and evolutionary changes. In  
134 both cases, we assume all patches are of constant and equal size. We track the fraction of  
135 infected hosts in each patch (given by  $i_q$  for patch  $q$ ) and the horizontal and vertical trans-  
136 mission probabilities of the resident and mutant, ( $h$  and  $v$  for the resident and  $h^*$  and  $v^*$   
137 for the mutant; see Table 1 for list of variables). We assume that neither multiple infec-  
138 tion nor loss of the symbiont once infected is possible. When hosts control transmission,  
139 we assume that a host's transmission probabilities determine its probability of infection.

140 When symbionts control transmission, uninfected hosts cannot be said to have a transmis-  
 141 sion probabilities. Instead we model the potentially infecting symbiont as determining the  
 142 transmission probability. Conflict over transmission mode might then occur between the  
 143 host receiving the symbiont and the incoming symbiont.

144 We model overlapping host generations in discrete time. The host lifecycle is given in  
 145 Figure 2. Each time step a host is chosen to reproduce, with the probability of reproduction  
 146 determined by the host’s patch and infection status. A host in patch  $q$  has fecundity  $f_{q,I}$  if  
 147 it is infected or  $f_{q,U}$  if uninfected. The probability that a host with fecundity  $f$  reproduces  
 148 is  $\frac{f}{N\bar{f}}$ , where  $N$  is the population size, and  $\bar{f}$  is the average fecundity.

$$\bar{f} = \sum_{q \in \text{Patches}} (1 - i_q) f_{q,U} + i_q f_{q,I}$$

149 When the symbiont affects host fecundity, we assume infected hosts have higher fecun-  
 150 dity than uninfected hosts in M-patches, and that the reverse is true in P-patches. When  
 151 the symbiont affects host lifespan, we assume all hosts have equal fecundity.

If the parent host is infected, its offspring has a chance to acquire the symbiont via vertical transmission. For a vertical transmission probability  $v$ , the probability that a host patch  $q$  gives birth to an uninfected or infected offspring is

$$\begin{aligned} \Pr(\text{Produces offspring born uninfected}) &= \begin{cases} f_{q,U}/(N\bar{f}), & \text{if parent is uninfected} \\ (1 - v)f_{q,I}/(N\bar{f}), & \text{if parent is infected} \end{cases} \\ \Pr(\text{Produces offspring born infected}) &= \begin{cases} 0, & \text{if parent is uninfected} \\ vf_{q,I}/(N\bar{f}), & \text{if parent is infected} \end{cases} \end{aligned} \quad (1)$$

152 After birth, newborns disperse to a new patch with probability  $d$  or stay in their natal  
 153 patch with probability  $1 - d$ . We assume that newborns must mature somewhat before

154 they become susceptible to horizontal infection, such that there is a window of time after  
 155 dispersal and before establishment where newborns may acquire the symbiont horizon-  
 156 tally, as is the case for many horizontally transmitted symbioses (Bright and Bulgheresi,  
 157 2010). For simplicity, we assume that when newborns arrive in the patch, they make con-  
 158 tact with a single neighbor, who, if infected, may infect the newborn with probability  $h$ .

159 Once newborns have dispersed and become infected (or not), they must establish in  
 160 their patch. Uninfected and infected newborns in patch  $q$  have establishment probabili-  
 161 ties  $s_{q,U}$  and  $s_{q,I}$ , respectively. When the conditional mutualism affects host establishment,  
 162 infected hosts are more likely to establish than uninfected in M-patches. The reverse is true  
 163 in P-patches. When the symbiont affects fecundity, we set all establishment probabilities  
 164 to 1 so that newborns always establish. (It would also be possible to assume all newborns  
 165 have an establishment probability less than 1, but this makes the simulations slower with-  
 166 out changing the results.)

167 For a newborn arriving in patch  $q$ , its chance of establishing as an uninfected (or in-  
 168 fected) adult is

$$\begin{aligned} \Pr(\text{Establishes as uninfected adult}) &= \begin{cases} (1 - hi_q)s_{q,U}, & \text{if born uninfected} \\ 0, & \text{if born infected} \end{cases} \\ \Pr(\text{Establishes as infected adult}) &= \begin{cases} hi_qs_{q,I}, & \text{if born uninfected} \\ s_{q,I}, & \text{if born infected} \end{cases} \end{aligned} \quad (2)$$

Finally, we assume patch sizes are constant, so if the newborn establishes, another host in the patch must die. If the newborn arrives in patch  $q$ , the probability that an adult host in  $q$  with mortality  $m$  dies is

$$\Pr(\text{Adult in patch } q \text{ dies} | \text{Newborn establishes in } q) = m \frac{\# \text{ patches}}{Nm_q}$$



where  $N$  is the population size, and  $\overline{m}_q$  is the average mortality in patch  $q$ .

$$\overline{m}_q = (1 - i_q)m_{q,U} + i_q m_{q,I}$$

Table 1: Variables

| Variable         | Definition                                                         |
|------------------|--------------------------------------------------------------------|
| $i_q$            | Fraction of infected hosts in patch $q$                            |
| $h$              | Resident horizontal transmission probability                       |
| $v$              | Resident vertical transmission probability                         |
| $h^*$            | Mutant horizontal transmission probability                         |
| $v^*$            | Mutant vertical transmission probability                           |
| $d$              | Probability a newborn disperses to the other patch                 |
| $N$              | Size of host population                                            |
| $\bar{f}$        | Average fecundity                                                  |
| $\overline{m}_q$ | Average mortality in patch $q$                                     |
| $f_{q,U}$        | Fecundity of uninfected hosts in patch $q$                         |
| $f_{q,I}$        | Fecundity of infected hosts in patch $q$                           |
| $s_{q,U}$        | Establishment probability of uninfected hosts in patch $q$         |
| $s_{q,I}$        | Establishment probability of infected hosts in patch $q$           |
| $m_{q,U}$        | Mortality of uninfected hosts in patch $q$                         |
| $m_{q,I}$        | Mortality of infected hosts in patch $q$                           |
| $M$              | Patch where symbiont is a mutualist                                |
| $P$              | Patch where symbiont is a parasite                                 |
| $t$              | Time in units of host births                                       |
| $\tau$           | Time in units of $tN$                                              |
| $X$              | Matrix giving mutant growth rates                                  |
| $A$              | Matrix giving mutant birth rates                                   |
| $B$              | Matrix giving mutant death rates                                   |
| $A', B'$         | Mutant birth and death rates multiplied by $N$                     |
| $A_v, A_h$       | Mutant symbiont births due to vertical and horizontal transmission |

## 169 2.2 Analytical Model

170 Before we can determine the fitness of a mutant host or symbiont, we must know what  
 171 fraction of hosts are currently infected in each patch. To determine the ecological equi-  
 172 librium fraction of infected hosts in a monomorphic population, we find the point where  
 173 the rate of change of the fraction of infected hosts in each patch vanishes. (The ecological

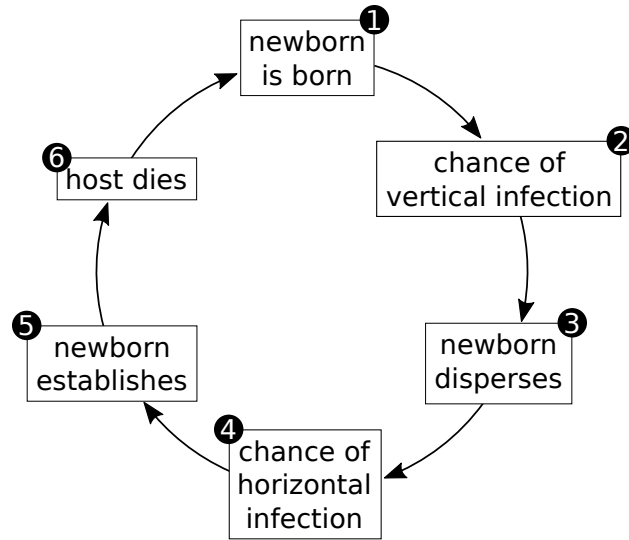

Figure 2: Host lifecycle. Numbers indicate the order the events happen in the simulations.

174 equilibrium is not affected by whether hosts or symbionts control transmission evolution.)  
 175 Assuming all fecundities and mortalities are nonzero, the rate of change of the fraction of  
 176 infected hosts in patch  $q$  is

$$\begin{aligned}
 \frac{\Delta i_q}{\Delta t} = & \frac{1}{N \bar{f} \bar{m}_q} \cdot \\
 & \{ [((1-d)(f_{q,U}(1-i_q) + f_{q,I}(1-v)i_q) + d(f_{q',U}(1-i_{q'}) + f_{q',I}(1-v)i_{q'})) hi_q + \\
 & ((1-d)f_{q,I}vi_q + df_{q',I}vi_{q'})] \cdot s_{I,q}m_{q,U}(1-i_q) - \\
 & [(1-d)(f_{q,U}(1-i_q) + f_{q,I}(1-v)i_M) + \\
 & d(f_{q',U}(1-i_{q'}) + f_{q',I}(1-v)i_{q'})] (1-hi_q) \cdot s_{U,q}m_{q,I}i_q \} \quad (3)
 \end{aligned}$$

177 where  $t$  is the time in units of one host birth per time step (see Appendix A for deriva-  
 178 tion).

179 We use Mathematica version 11 (Wolfram Research Inc., 2017) to solve for the values  
 180 of  $i_M$  and  $i_P$  that make Equation 3 be vanish for both patches (code given in suppl-  
 181 ment). While there may be multiple  $(i_M, i_P)$  pairs that satisfy the equation (for example

182 ( $i_M = 0, i_P = 0$ ) is always a solution), not all of them are stable in response to small per-  
183 turbations in the fraction of infected hosts. We consider the monomorphic population  
184 ecological equilibria to be only those solutions that are stable in response to perturbations  
185 (see Appendix A). In most cases, there is only one stable ecological equilibrium. In cases  
186 where there is more than one ecological equilibrium, we show one equilibrium in the main  
187 text and the other in the supplement. In all cases that we investigated, multiple ecological  
188 equilibria for a given pair of transmission probabilities do not have qualitatively different  
189 effects on the overall pattern of transmission evolution.

190 To determine the direction transmission rates evolve in, we find the invasion fitness  
191 of a mutant with slightly different horizontal and vertical transmission probabilities than  
192 the resident. Because mutants in different patches (and, for mutant hosts, mutants with  
193 different infection statuses) differ in their chances of producing offspring, we model the  
194 growth of the mutant when rare as a multitype branching process (Lehmann et al., 2016).  
195 We write a matrix  $X_\tau$  that gives the expected number of mutants produced by a mutant in  
196 each patch (or, for host control, an uninfected or infected mutant in each patch) at every  
197 time step, measuring time in units of host births times population size,  $\tau = tN$ . The lead-  
198 ing eigenvalue of  $X_\tau$  then gives the growth rate of the mutant when rare. The derivation  
199 of  $X_\tau$  for host and symbiont control follows straightforwardly from Equations 1 and 2 and  
200 is given in detail in Appendix A.

201 Once we have  $X_\tau$ , we can calculate the derivative of the mutant growth rate in terms  
202 of the mutant transmission probabilities. We can then use these derivatives to trace the  
203 path of transmission evolution. We find the derivatives of the leading eigenvalue of  $X_\tau$   
204 numerically and then numerically calculate the path of the evolutionary trajectories in  
205 Mathematica (see Appendix A).

## 206 2.3 Simulations

207 We simulate transmission mode evolution in Julia version 0.5.1 (Bezanson et al., 2017, the  
208 simulation code is available as a supplementary material ). Each time step, events hap-  
209 pen in the order in Figure 2, starting from host birth. A single host is selected to give  
210 birth, with the probability of selection determined by its patch and infection status. After  
211 a host is born, if hosts control transmission, we allow the newborn’s transmission prob-  
212 abilities to mutate. In the case of host control, the newborn host’s possibly mutated new  
213 transmission probability determines its probability of infection. When symbionts control  
214 transmission, the parent’s symbiont determines the vertical transmission probability, and  
215 then if infection is successful, the newborn’s symbiont is allowed to mutate.

216 The newborn then disperses to a new patch with probability  $d$  and remains in its natal  
217 patch with probability  $1 - d$ . If the newborn disperses, it is equally likely to end up in any  
218 patch except its natal one. If the newborn is so far uninfected, a random adult host in the  
219 newborn’s patch is then selected to be its potentially infection contact. If this adult is in-  
220 fected, horizontal transmission occurs with probability given by the newborn’s horizontal  
221 transmission probability (host control case) or the neighbor’s symbiont’s horizontal trans-  
222 mission probability (symbiont control case). If the newborn becomes infected and the  
223 symbiont controls transmission, the newborn’s symbiont may then mutate. Finally, the  
224 newborn’s establishment in the patch is determined by its infection status and location. If  
225 the newborn successfully establishes, a random adult host is chosen to die.

226 Before allowing transmission mode to evolve, we ran the simulation for 4000 time steps  
227 to allow the resident population to equilibrate. We started the simulations from an 11x11  
228 grid starting points evenly spaced over the space of all possible transmission probabili-  
229 ties. After the equilibration period, we ran each simulation for  $10^7$  time steps. We used a  
230 mutation rate of 0.02, with mutations normally distributed with a mean of the originally  
231 transmission probability and standard deviation of 0.05. For the host control case, we also  
232 had a 0.5% chance that an uninfected newborn would be spontaneously infected. We did

233 this to prevent the infection from being lost by chance leading transmission to evolve neu-  
234 trally for the rest of the simulation. We analyzed the simulations by finding the average  
235 transmission rates and fraction of infected hosts in M- and P-patches at the last time step  
236 using the plyr package (Wickham, 2011) in R (R Core Team, 2017).

## 237 **3 Results**

### 238 **3.1 Host Control of Transmission**

239 The results for infinite populations suggest that different factors control when vertical and  
240 horizontal transmission can evolve. Vertical transmission evolves when newborn hosts  
241 rarely disperse from their natal patch. Horizontal transmission evolves when there is a  
242 higher fraction of infected hosts in M-patches than P-patches. When the symbiont af-  
243 fects fecundity, high horizontal transmission erodes the difference in the fraction of in-  
244 fected hosts between patches. The difference is maintained when the symbiont affects  
245 lifespan. High horizontal transmission is more likely to evolve when the symbiont affects  
246 lifespan. When we simulate finite populations, polymorphism in transmission probabili-  
247 ties between patches arises at low dispersal rates. At high dispersal rates, the simulations  
248 resemble the infinite population case.

#### 249 **3.1.1 Analytical Model (Infinite Population)**

##### 250 **Symbiont Affects Lifespan**

251 When the symbiont affects host lifespan in a monomorphic population, the ecological  
252 equilibrium fraction of infected hosts is generally higher in M-patches than P-patches (Fig-  
253 ure 3a-f), except when both transmission probabilities are too low and the infection dies  
254 out (white regions in Figure 3) or when both transmission probabilities are 1 and all hosts  
255 in both patches are infected. In both cases, transmission evolves neutrally, since changes

256 in transmission do not affect a host's chances of becoming infected.

257       Aside from the above cases, host evolutionary trajectories lead to either complete hor-  
258 izontal and no vertical transmission, i.e. ( $h = 1, v = 0$ ); or they lead to complete vertical  
259 transmission and no horizontal transmission, ( $h = 0, v = 1$ ). At low dispersal rates, the  
260 basins of attraction of the two endpoints are very similar in size (Figure 3a,d). As the dis-  
261 persal rate increases, more trajectories lead to the point ( $h = 1, v = 0$ ). This corresponds to  
262 changes in the transmission probabilities that lead to high fractions of parasitized hosts.  
263 As dispersal increases, even intermediate values of horizontal and vertical transmission  
264 paired with high levels of the other lead to a large fraction of infected hosts in Patch P.  
265 However, the effect is more pronounced for high vertical transmission probabilities, which  
266 require much lower horizontal transmission probabilities in order to contain the symbiont  
267 to Patch M. (This can be seen in the increasing length of the top of the dark triangle in Fig-  
268 ure 3d-f compared to its right side.) Finally, when the dispersal rate is maximum ( $d = 0.5$   
269 for the two patch case, meaning newborns have an equal chance of ending up in either  
270 patch), all host evolutionary trajectories lead to complete horizontal and no vertical trans-  
271 mission (Figure 3c,f). This is because high vertical transmission leads to a high fraction of  
272 parasitized hosts for all horizontal transmission probabilities, including  $h = 0$ .

273       While the basin of attraction of high horizontal versus high vertical transmission de-  
274 pends on the dispersal rate, evolutionary trajectories always lead to a beneficial (to hosts)  
275 distribution of the symbiont, in the sense that they maintain a high fraction of infected  
276 hosts in the patch where the symbiont is mutualistic and a low fraction of infected hosts  
277 in the patch where the symbiont is parasitic.

### 278 **Symbiont affects fecundity**

279 When the symbiont affects fecundity, high horizontal transmission probabilities always  
280 lead to a high ecological equilibrium fraction of infected hosts in Patch P. In contrast, high  
281 vertical transmission probabilities, combined with low horizontal transmission probabili-

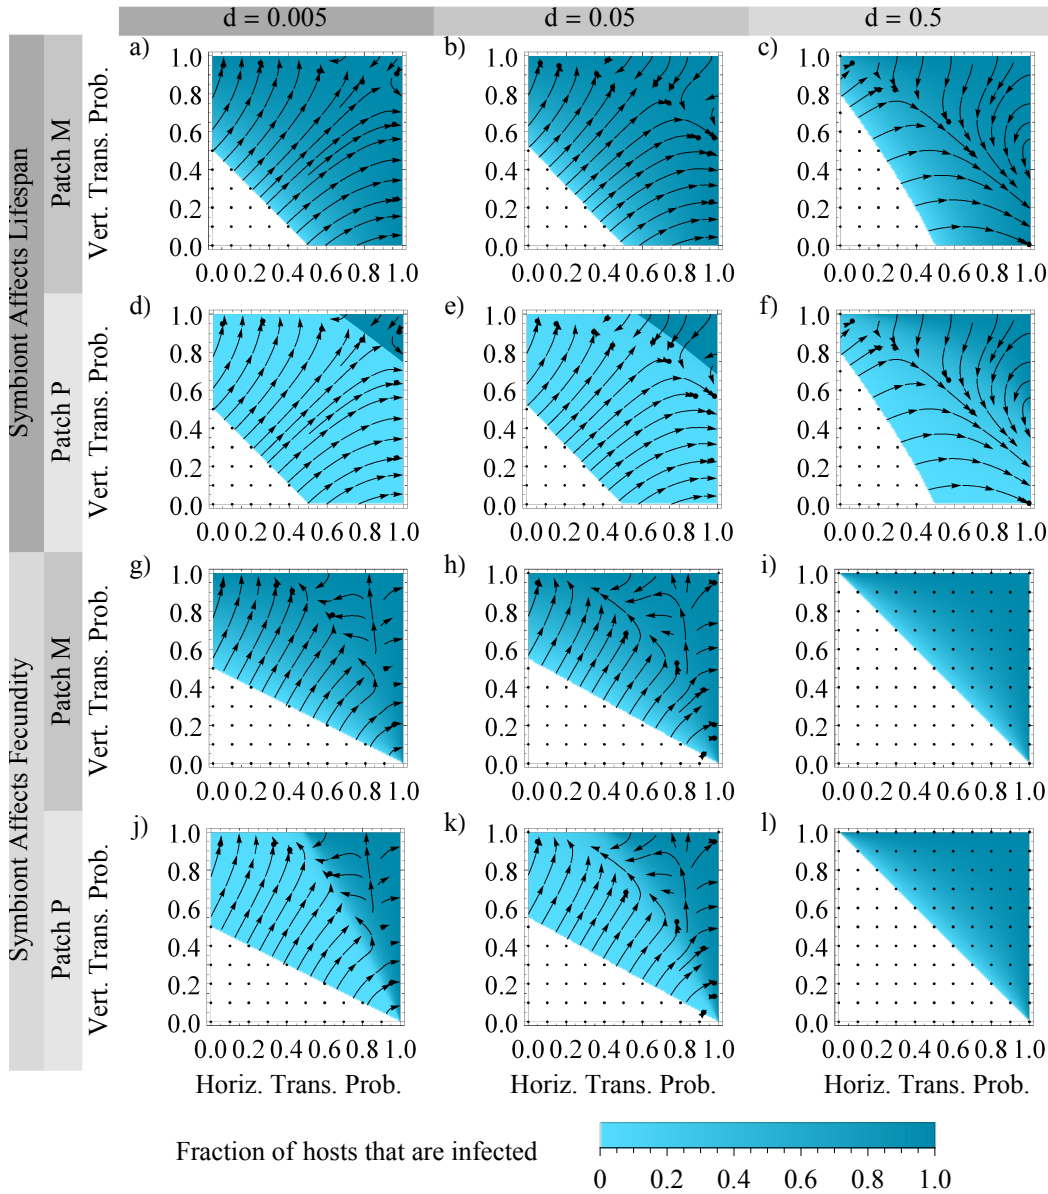

Figure 3: Ecological equilibria and host evolutionary trajectories for an infinite population. Panels a-f: symbiont affects host lifespan, panels g-l: symbiont affects host fecundity. Columns indicate dispersal rates. The upper and lower pairs of panels in a column each represent a single metapopulation, with the upper panel indicating the fraction of infected hosts in Patch M, and the lower the fraction of infected hosts in Patch P (e.g. panels a and d represent a single population). For each plot, colors indicate the fraction of infected hosts in the patch when the population is monomorphic for a given pair of horizontal and vertical transmission rates. Arrows indicate hosts evolutionary trajectories, with dots where transmission evolves neutrally. Panels from the same metapopulation show the same trajectories, as the entire population evolves together. Parameters, panels a-f:  $f_{M,U} = f_{P,I} = 0.5$ ,  $f_{M,I} = f_{P,U} = 1$ ,  $s_{M,U} = s_{M,I} = s_{P,U} = s_{P,I} = 1$ ; panels g-l:  $f_{M,U} = f_{P,I} = f_{M,I} = f_{P,U} = 1$ ,  $s_{M,U} = s_{P,I} = 0.5$ ,  $s_{M,I} = s_{P,U} = 0.5$ .

282 ties, produce the largest difference in the fraction of infected hosts between Patches M and  
283 P (Figure 3g-l). As a result, most trajectories lead to complete vertical and no horizontal  
284 transmission, ( $h = 0, v = 1$ ).

285 However, unlike the case where the symbiont affects lifespan, not all trajectories lead  
286 to transmission probabilities that contain the symbiont to the patch where it is beneficial.  
287 When dispersal is not maximum ( $d < 0.5$ ), populations that start with too high horizontal  
288 transmission probabilities evolve towards complete infection, due the fact that symbionts  
289 become abundant everywhere, and therefore the host has little chance of escaping them in  
290 Patch P by a small decrease in transmission rates. Therefore, there is little additional cost  
291 to hosts from increasing transmission in Patch P, and a slight benefit in Patch M. Trajecto-  
292 ries that lead to complete infection end up in one of two regions. In the first region, the  
293 population has complete horizontal transmission and at least some vertical transmission,  
294 ( $h = 1, v > 0$ ). In the second region, the population has complete vertical transmission  
295 and high horizontal transmission, ( $h > h^*, v = 1$ ). The precise value of  $h^*$  depends on  
296 the dispersal rate and the costs/benefits provided by the symbiont. Interestingly, if the  
297 symbiont is more costly in Patch P than it is beneficial in Patch M, all trajectories lead to  
298 the point ( $h = 0, v = 1$ ). On the other hand, if the symbiont is more beneficial in Patch M  
299 than harmful in Patch P, populations are more likely to evolve towards complete infection  
300 (Figure S3).

301 As the dispersal rate increases, a relatively high frequency of parasitized hosts appear  
302 at increasingly lower values of horizontal transmission, particularly at high vertical trans-  
303 mission probabilities (as shown by the increasing size of the dark regions at the top of  
304 Figure 3 from panels j to k). This means that more evolutionary trajectories start in regions  
305 where the symbiont is not well contained to Patch M, and a small decrease in transmission  
306 probabilities is not as beneficial to hosts in Patch P as an increase is to hosts in Patch M.  
307 More trajectories therefore lead to complete infection in both patches.

308 Finally, when newborns have an equal chance of ending up in either patch (dispersal



309 rate = 0.5, Figure 3i-j), the two patches have the same frequency of infected hosts at all  
310 transmission probabilities. When the symbiont's costs in Patch P exactly equal its benefits  
311 in Patch M (as in Figure 3), transmission is selectively neutral. The benefits of a small  
312 increase or decrease in one patch are exactly balanced with the cost of that change in the  
313 other. If the costs and benefits are not equal (Figure S3), hosts will either evolve towards  
314 low transmission and loss of the symbiont (when the costs are higher than the benefits) or  
315 high transmission and complete infection (when the benefits are higher than the costs).

### 316 **3.2 Symbiont Affects Lifespan and Fecundity**

317 In the supplement, we investigate the case where the symbiont affects both host lifespan  
318 and fecundity. In general, if the symbiont's effect on one fitness component is significantly  
319 stronger than the other, transmission evolution largely resembles the case where only the  
320 stronger effect is present (Figures S4 and S5). One exception is if the symbiont largely  
321 affects fecundity and the dispersal rate is maximum. When the symbiont affects fecun-  
322 dity equally in both patches and does not affect lifespan, transmission mode is selectively  
323 neutral when dispersal is maximum. However, a small symbiont effect on lifespan can  
324 break the symmetry and allow hosts to evolve toward either complete infection, loss of  
325 the symbiont, or even the point ( $h = 1, v = 0$ ). (The last of these provides a small degree  
326 of symbiont containment.)

327 When the symbiont has a strong effect on both components of host fitness, the results  
328 are more complicated. The outcome depends on the conditions which trigger the effects  
329 on each component as well as the relative strengths of the effects on each component.  
330 However, two general trends emerge. The first is that using high horizontal combined with  
331 low vertical transmission to contain the symbiont to M-patches is only an option when the  
332 symbiont can decrease lifespan. For example, when the symbiont affects fecundity, adding  
333 a conditional (in Patch P) or unconditional (in Patches M and P) lifespan cost to infection  
334 allows horizontal transmission to evolve as a method of containment (Figures S4 and S6).

335 Related to this, symbiont containment can often be improved by increasing the costs  
336 of infection. If trajectories do not lead to containment, increasing the cost of infection  
337 through fecundity or lifespan effects, can increase the number of trajectories leading to  
338 symbiont containment (Figures S4, S6, and S7). This is true even if hosts in M-patches  
339 bear the additional cost of infection (Figures S6 and S7). (On the other hand, increasing  
340 the cost of infection can also cause the symbiont to be lost in some cases, generally when  
341 the dispersal rate is maximum and the symbiont largely affects fecundity, e.g. Figure S6.)

### 342 **3.2.1 Simulations (Finite Population)**

343 At high dispersal rates, the simulations of finite host populations behave much like the  
344 infinite population case (Figure 4c,f,i,l). However, as the dispersal rate decreases, the sim-  
345 ulations diverge from the analytical results, in that the patches behave more like separate  
346 populations. At low dispersal rates, hosts residing in the patch where the symbiont is  
347 beneficial have higher average transmission probabilities than predicted for the infinite  
348 population case (Figure 4a,g have a large proportion of simulations with high average hor-  
349 izontal and vertical transmission probabilities, while the infinite population case predicts  
350 only one high transmission probability). Patches where the symbiont is parasitic tend to  
351 lose the infection (or have the symbiont at very low frequencies due to spontaneous infec-  
352 tion) and then have transmission probabilities that evolve neutrally (Figure 4d,j and Figure  
353 S8). As the population size increases, lower dispersal rates are needed for the population  
354 to behave like separate patches, and the population resembles the infinite population at  
355 increasingly lower dispersal rates (Figure S9).

### 356 **3.3 Symbiont Control**

357 In both the analytical model and simulations, symbionts evolve high horizontal and ver-  
358 tical transmission probabilities (Figures S10 and S11). In particular, symbionts always  
359 evolve complete vertical transmission in the infinite population case. The horizontal trans-

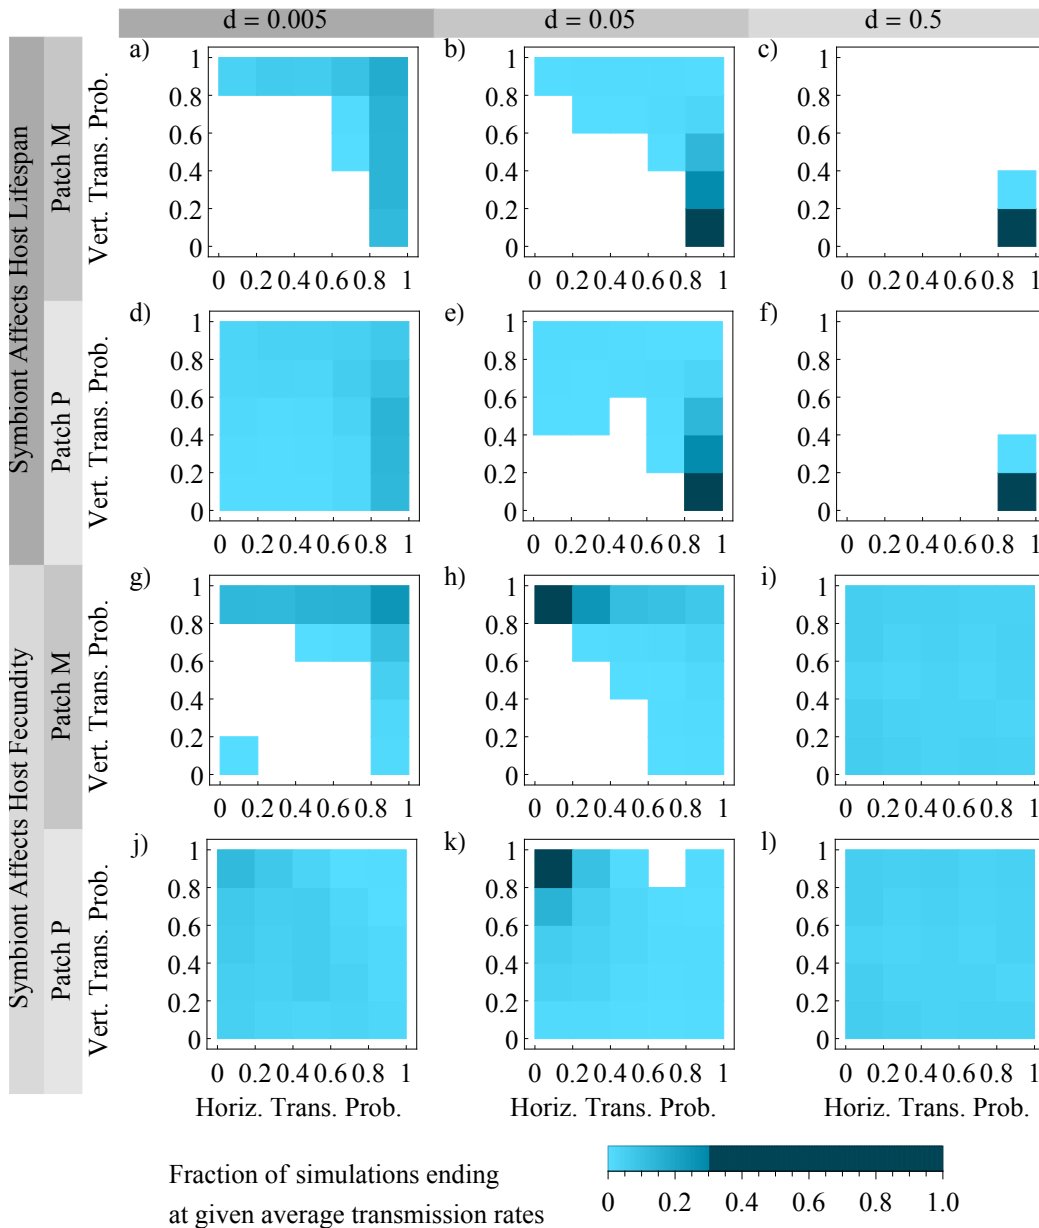

Figure 4: Simulations of transmission evolution under host control. Colors indicate fraction of populations ending with each combination of average horizontal and vertical transmission probabilities. Simulations were started from a grid of start points spaced 0.1 apart in transmission probability. Ten simulations at each start point were run for  $10^7$  time steps for every parameter combination. Parameters: 2 patches,  $N = 200$ , mutation rate = 0.02, mutation standard deviation = 0.05, spontaneous infection probability = 0.005, panels a-f:  $f_{M,U} = f_{P,I} = 0.5$ ,  $f_{M,I} = f_{P,U} = s_{M,U} = s_{M,I} = s_{P,U} = s_{P,I} = 1$ , panels g-l:  $s_{M,U} = s_{P,I} = 0.5$ ,  $f_{M,U} = f_{M,I} = f_{P,U} = f_{P,I} = s_{M,I} = s_{P,U} = 1$ .

360 mission probability evolves neutrally once 100% vertical transmission is reached. This may  
361 be due to the fact that at high levels of infection, vertical transmission guarantees access  
362 to uninfected hosts to infect. The difference between selection pressure on hosts and sym-  
363 bionts is shown in Figure 5. In general, the most conflict is found at high vertical transmis-  
364 sion probabilities. When the symbiont affects lifespan, conflict occurs at high vertical and  
365 horizontal transmission. As the dispersal rate increases and vertical transmission becomes  
366 less beneficial to hosts, the region of conflict expands to include low vertical transmission  
367 and intermediate transmission. This creates a triangular region where too much trans-  
368 mission, and particularly too much vertical transmission, leads to host-symbiont conflict.  
369 When the symbiont affects host fecundity, most conflict still occurs at high vertical trans-  
370 mission probabilities, but now intermediate horizontal transmission provokes the most  
371 conflict. This is because hosts at high horizontal transmission probabilities evolve towards  
372 complete infection, reducing the conflict between hosts and symbionts.

## 373 **4 Discussion**

374 We investigate conditional mutualisms with spatial variation in symbiont quality and find  
375 that hosts evolve different transmission modes depending on the ecological distribution  
376 of infected hosts, which in turn depends on the aspect of fitness symbionts affect. When  
377 symbionts affect host lifespan, hosts are able to evolve high horizontal and low vertical  
378 transmission, which contains the symbiont to the patch where it is a mutualist. They are  
379 able to do this because hosts with the “wrong” status die more quickly and do not remain  
380 in the population to affect incoming newborns’ chance of infection. This sets up a differ-  
381 ence in the distribution of infected hosts so that newborns benefit from higher horizontal  
382 transmission rates, because their probability of acquiring the symbiont is higher where it  
383 is beneficial.

384 When the symbiont affects fecundity, hosts with the “wrong” infection status repro-

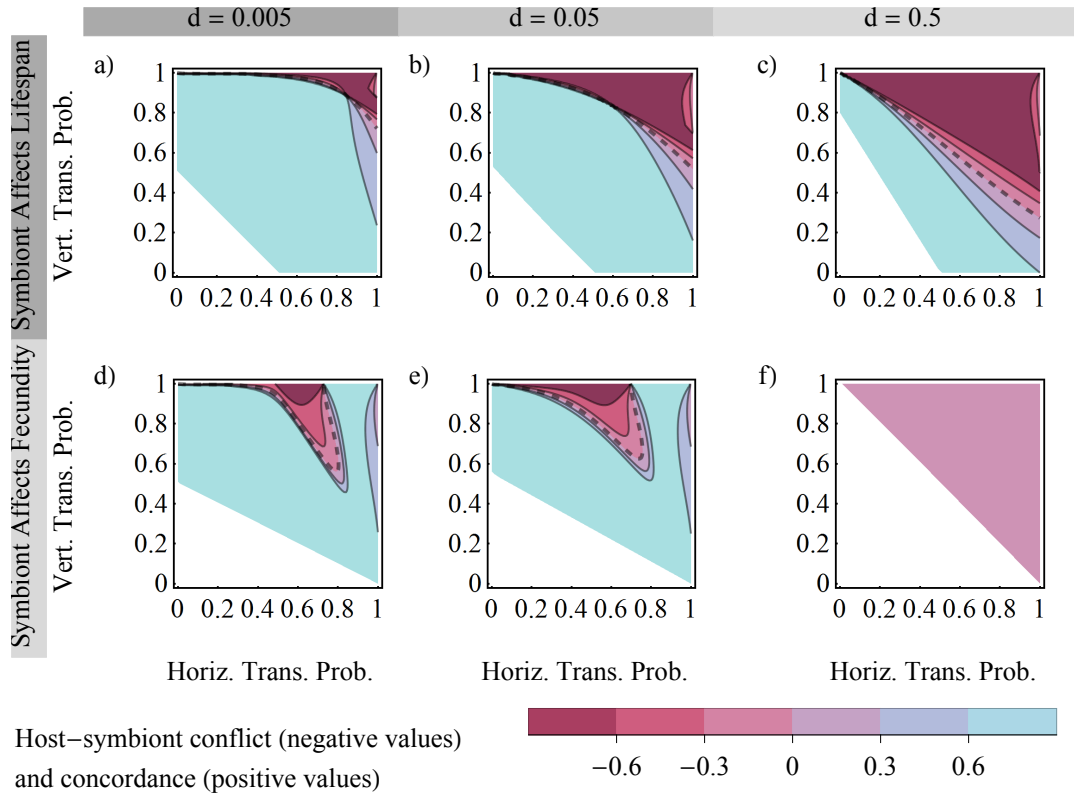

Figure 5: *Host-symbiont conflict*: Host-symbiont conflict when symbiont affects lifespan (top row) or fecundity (bottom row). Colors indicate the degree to which host and symbiont evolutionary trajectories point in the same direction, defined as the cosine of the selection vectors under host and symbiont control, or 0, if at least one of the selection vectors has magnitude 0. If trajectories are perpendicular or a partner does not experience selection, conflict is 0. Negative values indicate trajectories point in opposite directions (conflict), and positive values indicate that trajectories point in the same direction (concordance). Dashed lines separate regions of conflict and concordance. White regions indicate transmission rates where the infection cannot be maintained. Parameters, top row:  $f_{M,U} = f_{P,I} = 0.5$ ,  $f_{M,I} = f_{P,U} = 1$ ,  $s_{M,U} = s_{M,I} = s_{P,U} = s_{P,I} = 1$ ; parameters, bottom row:  $f_{M,U} = f_{M,I} = f_{P,U} = f_{P,I} = 1$ ,  $s_{M,U} = s_{P,I} = 0.5$ ,  $s_{M,I} = s_{P,U} = 1$ .

385 duce less, but remain in the population just as long, which allows them to affect the in-  
386 fection status of incoming newborns. Unless the distribution of infected hosts is already  
387 skewed toward more infected hosts in the patch where the symbiont is beneficial, hosts  
388 gain no benefit from evolving horizontal transmission. Even worse, an increase in hor-  
389 izontal transmission produces some hosts with the “wrong” infection status, who then  
390 persist in the population to alter the infection probabilities of incoming newborns. This  
391 means that past a threshold transmission probability, horizontal transmission is no longer  
392 effective at maintaining different distributions of infected hosts. Hosts are left with using  
393 vertical transmission to contain the symbiont when dispersal is low and host lineages are  
394 mostly confined to the same patch. When dispersal is at its maximum, the patches have  
395 equal fractions of infected hosts, and the costs and benefits of infection determine if the  
396 infection is lost (when the symbiont is more harmful in P-patches than beneficial in M-  
397 patches), spreads to everyone (when the symbiont is less harmful in P-patches than ben-  
398 efiticial in M-patches), or drifts because transmission rate is neutral (when symbiont costs  
399 and benefits are exactly equal).

400 When the symbiont affects lifespan and fecundity, the nature and magnitude of the  
401 costs of infection have a large influence on transmission evolution. Hosts are only able to  
402 use horizontal transmission to contain the symbiont when the symbiont decreases lifes-  
403 pan. This decrease in lifespan does not have to be conditional on hosts’ environment in  
404 order to allow symbiont containment. Furthermore, adding conditional or unconditional  
405 lifespan or fecundity costs of infection can increase the fraction of host evolutionary tra-  
406 jectories that lead to symbiont containment, rather than complete infection. These results  
407 suggest that the costs of a conditional mutualism are key to determining its evolutionary  
408 outcome. They also suggest that a conditional mutualism that has more costs than bene-  
409 fits may actually be better for hosts than more “mutualistic” conditional mutualisms, by  
410 increasing hosts’ chances of evolving transmission modes that contain the symbiont to  
411 locations where it is beneficial.

412 The simulations largely confirm that our results hold for finite populations. However,  
413 they suggest an alternative way that hosts in small populations may respond to a con-  
414 ditional mutualism when dispersal rate is low. If dispersal rate is small enough relative  
415 to the population size, the subpopulations of hosts in each patch behave more like sepa-  
416 rate populations, and exhibit local adaptation. Hosts in M-patches evolve high horizontal  
417 and vertical transmission rates, while hosts in P-patches lose the symbiont (or have it at  
418 low frequency due to spontaneous infection) and have transmission evolve neutrally. This  
419 suggests that at low dispersal rates, it is possible that hosts in small populations have more  
420 options for transmission mode evolution. Hosts whose symbiont affects their fecundity  
421 may not be constrained to use purely vertical transmission when the dispersal rate is low.  
422 However, the main problem for hosts still occurs at high dispersal rates, when the patches  
423 do not behave like separate populations, and hosts whose symbiont affects fecundity are  
424 forced to have the same fraction of infected hosts in both patches. As it is unlikely in na-  
425 ture that symbiont costs and benefits will be exactly balanced, in practice this may lead  
426 to the symbiont being lost if it is slightly more harmful or maintained in all hosts if it is  
427 slightly more beneficial.

428 Our model of symbiont control shows that, as predicted, when there are no direct costs  
429 to transmission and population size is fixed, symbionts evolve high transmission rates and  
430 end up infecting all hosts in the population. In both the analytical and simulation models,  
431 symbionts evolve complete vertical transmission and evolve a nonzero probability of hor-  
432 izontal transmission that guarantees complete infection of all hosts (this may be less than  
433 a 100% chance of horizontal transmission, since vertical transmission also contributes to  
434 the chance of infection). Further, vertical, rather than horizontal, transmission is maxi-  
435 mized because at high frequencies of infected hosts, vertical transmission is the best way  
436 to guarantee that newborns are infected (Lipsitch et al., 1995).

437 Our results can be used to predict the spread of symbionts and transmission mode  
438 evolution in known conditional mutualisms, if the symbiont's effect on the host and the

439 dispersal rate are known. For example, in the symbiosis between aphids and their obli-  
440 gate symbiont *Buchnera aphidicola*, a mutation in the promoter of *ibpA*, which encodes one  
441 *B. aphidicola*'s heat shock proteins, causes mutant *B. aphidicola* to increase host fecundity  
442 (relative to wild-type *B. aphidicola*) in cool conditions and nearly eliminate reproduction  
443 in warm conditions (Dunbar et al., 2007). The mutant has been found at frequencies up to  
444 20% in natural populations, despite its large potential cost and the fact that *B. aphidicola* is  
445 strictly vertically transmitted. Our results suggest that the lack of horizontal transmission  
446 is not necessarily a barrier to the persistence of the symbiont in natural populations, and  
447 may in fact benefit its hosts, provided that aphid dispersal between regions with different  
448 temperatures is relatively rare.

449 One other example to which we can apply our model is the symbiosis between the  
450 grass *Agrostis hyemalis* and the fungus *Epilichloë amarillans*. *E. amarillans* increases host fe-  
451 cundity under drought conditions and decreased host biomass in the presence of certain  
452 soil microbes (Davitt et al., 2011). It is difficult to know exactly how biomass affects lifes-  
453 pan and fecundity, but as long as biomass has a smaller effect on lifespan than fecundity,  
454 we would predict that vertical transmission, particularly if seeds disperse to new environ-  
455 ments only rarely, would be more likely to arise. Indeed, vertical transmission is observed  
456 in this symbiosis, although without knowing the relative effect of biomass on lifespan and  
457 fecundity, it is difficult to be certain whether the system matches our predictions.

458 While many other conditional mutualisms are known, in most of these the symbiont's  
459 effect on different components of host fitness is currently unknown. Our results suggest  
460 that quantifying context-dependent variation in fitness components could allow predic-  
461 tions of transmission mode evolution and symbiont spread.

462 An important overall conclusion from our model is that in conditional mutualisms, it  
463 is not just the costs and benefits of infection that matter, but also the component of fit-  
464 ness that the symbiont affects. The component of fitness influences the distribution of  
465 the infection on ecological timescales, meaning it may be useful for predicting the spread



466 of conditional mutualisms of interest. The ecological distribution of infected hosts also  
467 strongly influences transmission mode evolution. As transmission mode is predicted to  
468 itself create selective pressure on virulence, the ecological distribution of infected hosts  
469 over evolutionary time may feed back not only on transmission but also on the nature of  
470 the symbiosis itself. Thus, the feedback we found between symbiont effects on host fitness  
471 and transmission evolution may be important for predicting both the short- and long-term  
472 future of conditional mutualisms. As more symbioses are being found to have conditional  
473 effects, understanding the precise nature of symbiont effects on their hosts may be useful  
474 for predicting the short- and long-term future of these symbioses.

## 475 Appendix

### 476 A Calculations for Infinite Population Model

#### 477 A.1 Equilibrium Distribution of Infected Hosts

478 From Equations 1 and 2, we can see that the fraction of infected hosts in a patch affects  
479 hosts' birth, establishment, and death probabilities, as well as symbionts' transmission  
480 opportunities. So, before we can find the invasion fitness of a mutant host or symbiont,  
481 we need to find the equilibrium fraction of infected hosts. We find the equilibrium fraction  
482 of infected hosts analytically for an infinite host population with two patches. We call these  
483 patches M and P and assume they are each of size  $\frac{N}{2} \rightarrow \infty$ . In patch M, the symbiont is a  
484 mutualist that increases either infected host fecundity or lifespan (depending on the nature  
485 of the conditional mutualism) above that of uninfected hosts. In patch P, the reverse is true.  
486 We will usually assume either  $f_{M,I} = f_{P,U} > f_{M,U} = f_{P,I}$  or  $s_{M,I} = s_{P,U} > s_{M,U} = s_{P,I}$ . In  
487 the supplement, we relax this assumption and also consider the case where the symbiont  
488 affects lifespan through adult mortality ( $m_{M,I} = m_{P,U} > m_{M,U} = m_{P,I}$ ).

To find the equilibrium fraction of infected hosts in patches M and P, we must solve

$$\begin{cases} \Delta i_M = 0 \\ \Delta i_P = 0 \end{cases}$$

489 for the fraction of infected hosts in each patch,  $i_M$  and  $i_P$ .

490 To do this, we must write down formulas for the change in infected hosts in a patch.  
491 The fraction of infected hosts in a patch should increase if an infected newborn establishes  
492 and an uninfected adult dies. It should decrease if an uninfected newborn establishes and  
493 an infected adult dies. All other events (newborn failing to establish, uninfected newborn  
494 establishing in place of an uninfected adult, infected newborn establishing in place of an  
495 infected adult) should not lead to a change in the frequency of infected hosts in the patch.

Because each patch is of size  $\frac{N}{2}$ , the addition or subtraction of a single infected host should change the frequency of infected hosts in the patch by  $\frac{1}{N/2} = \frac{2}{N}$ . The rate of change in frequency in infected hosts in a patch should then be

$$\frac{\Delta i_q}{\Delta t} = \frac{2}{N} [\text{Pr}(\text{Infected host establishes}) \cdot \text{Pr}(\text{Uninfected host dies}) - \text{Pr}(\text{Uninfected host establishes}) \cdot \text{Pr}(\text{Infected host dies})]$$

496 where  $t$  is time in units of host births, such that one host is born every time  $t$  increases by

497 1.

Using Equations 1 and 2, and taking into account the fact that newborn hosts may enter

a patch via dispersal, the rate of change in the fraction of infected hosts is

$$\frac{\Delta i_q}{\Delta t} = \frac{1}{N \bar{f} \bar{m}_q} \cdot \{ [((1-d)(f_{q,U}(1-i_q) + f_{q,I}(1-v)i_q) + d(f_{q',U}(1-i_{q'}) + f_{q',I}(1-v)i_{q'})) h i_q + ((1-d)f_{q,I}v i_q + d f_{q',I}v i_{q'})] \cdot s_{I,q} m_{q,U}(1-i_q) - [(1-d)(f_{q,U}(1-i_q) + f_{q,I}(1-v)i_M) + d(f_{q',U}(1-i_{q'}) + f_{q',I}(1-v)i_{q'})] (1-h i_q) \cdot s_{U,q} m_{q,I} i_q \}$$

498 where  $q$  represents patch  $M$  or  $P$ , and  $q'$  is the other patch. Note that the rate of change is  
 499 now scaled by  $\frac{1}{N}$ , because there are  $\frac{N}{2}$  hosts in the patch which each have their chance to  
 500 reproduce scaled by  $\frac{1}{N}$ .

By constraining all fecundities and mortalities ( $f_{M,U}$ ,  $m_{M,U}$  etc.) to be greater than 0, we can ensure that the average fecundity,  $\bar{f}$ , and both average mortalities,  $\bar{m}_M$  and  $\bar{m}_P$  are always greater than 0. Then we can solve the slightly simpler set of equations

$$\begin{cases} \bar{f} \bar{m}_M \frac{\Delta i_M}{\Delta t} = 0 \\ \bar{f} \bar{m}_P \frac{\Delta i_P}{\Delta t} = 0 \end{cases} \quad (4)$$

501 We solve this system numerically in the supplement using Mathematica version 11.1 (Wolfram Research Inc., 2017).  
 502

It is possible that some of the equilibrium fractions of infected hosts may not be stable. To find stable equilibria, we select those solutions of equation 4 for which the eigenvalues of the Jacobian are negative. The Jacobian is defined as

$$J = \begin{bmatrix} \frac{\Delta i_M}{\Delta t} & \frac{\Delta i_M}{\Delta t} \\ \frac{\Delta i_P}{\Delta t} & \frac{\Delta i_P}{\Delta t} \\ \frac{\Delta i_M}{\Delta t} & \frac{\Delta i_P}{\Delta t} \end{bmatrix}$$

503 We find the eigenvalues of the Jacobian at each equilibrium numerically using Mathemat-

504 ica (supplement) and select those equilibria that are stable for invasion analysis.

## 505 A.2 Transmission Mode Evolution - Host Control

We can now investigate transmission mode evolution when transmission is a host trait. We want to find the invasion fitness of a mutant host with slightly different horizontal and vertical transmission rates than the resident. To do this, we can think of the growth of the mutant when rare as a multitype branching process (Lehmann et al., 2016). We write a matrix ( $X_t$ ) that gives the expected number of mutants produced by an uninfected or infected mutant in each patch every time step (measuring time in units of host births,  $t$ ). Rows of  $X_t$  correspond to the location and infection status of mutants produced. The first two rows correspond to uninfected and infected mutants produced in patch M, and the third and fourth rows are the same for patch P. Columns of  $X_t$  correspond to the type of mutant producing a new mutant (or “producing” itself by surviving to the next time step). Columns are in the same order as rows. Then we have

$$\begin{bmatrix} \# \text{ Uninfected mutants in M at } t + 1 \\ \# \text{ Infected mutants in M at } t + 1 \\ \# \text{ Uninfected mutants in P at } t + 1 \\ \# \text{ Infected mutants in P at } t + 1 \end{bmatrix} = X_t \begin{bmatrix} \# \text{ Uninfected mutants in M at } t \\ \# \text{ Infected mutants in M at } t \\ \# \text{ Uninfected mutants in P at } t \\ \# \text{ Infected mutants in P at } t \end{bmatrix}$$

506 To find  $X_t$ , let  $A$  be a matrix that gives the probability a mutant gives birth to an un-  
 507 infected or infected offspring that successfully establish in each patch (rows and columns  
 508 in same order as in  $X_t$ ). Let  $B$  be a matrix that gives the probability that an uninfected or  
 509 infected mutant in each patch dies. Then

$$X_t = I + A - B$$

510 where  $I$  is the identity matrix and indicates that besides giving birth and dying, mutants

511 may simply persist in the population from one time step to the next.

We can get the probabilities in  $A$  from the product of Equations 1 and 2. The probabilities we need for  $A$  are the following:

$$\Pr(\text{Uninfected mutant produces uninfected offspring}) = \begin{cases} \Pr(U, q \rightarrow U, q) = (1 - d) \frac{f_{q,U}}{Nf} (1 - h^* i_q) s_{q,U}, & \text{if offspring stays in } q \\ \Pr(U, q \rightarrow U, q') = d \frac{f_{q,U}}{Nf} (1 - h^* i_{q'}) s_{q',U}, & \text{if offspring disperse to } q' \end{cases} \quad (5)$$

$$\Pr(\text{Uninfected mutant produces infected offspring}) = \begin{cases} \Pr(U, q \rightarrow I, q) = (1 - d) \frac{f_{q,U}}{Nf} h^* i_q s_{q,I}, & \text{if offspring stays in } q \\ \Pr(U, q \rightarrow I, q') = d \frac{f_{q,U}}{Nf} h^* i_{q'} s_{q',I}, & \text{if offspring disperse to } q' \end{cases} \quad (6)$$

$$\Pr(\text{Infected mutant produces uninfected offspring}) = \begin{cases} \Pr(I, q \rightarrow U, q) = (1 - d) \frac{f_{q,I}(1-v^*)}{Nf} (1 - h^* i_q) s_{q,U}, & \text{if offspring stays in } q \\ \Pr(I, q \rightarrow U, q') = d \frac{f_{q,I}(1-v^*)}{Nf} (1 - h^* i_{q'}) s_{q',U}, & \text{if offspring disperse to } q' \end{cases} \quad (7)$$

$$\Pr(\text{Infected mutant produces infected offspring}) = \begin{cases} \Pr(I, q \rightarrow I, q) = (1 - d) \left( \frac{f_{q,I}(1-v^*)}{Nf} h^* i_q s_{q,I} + \frac{f_{q,I}v^*}{Nf} s_{q,I} \right), & \text{if offspring stays in } q \\ \Pr(I, q \rightarrow I, q') = d(1 - d) \left( \frac{f_{q,I}(1-v^*)}{Nf} h^* i_{q'} s_{q',I} + \frac{f_{q,I}v^*}{Nf} s_{q',I} \right), & \text{if offspring disperse to } q' \end{cases} \quad (8)$$

Using the above probabilities of mutant reproduction, we can write  $A$  as

$$A = \begin{bmatrix} \Pr(U, M \rightarrow U, M) & \Pr(I, M \rightarrow U, M) & \Pr(U, P \rightarrow U, M) & \Pr(I, P \rightarrow U, M) \\ \Pr(U, M \rightarrow I, M) & \Pr(I, M \rightarrow I, M) & \Pr(U, P \rightarrow I, M) & \Pr(I, P \rightarrow I, M) \\ \Pr(U, M \rightarrow U, P) & \Pr(I, M \rightarrow U, P) & \Pr(U, P \rightarrow U, P) & \Pr(I, P \rightarrow U, P) \\ \Pr(U, M \rightarrow I, P) & \Pr(I, M \rightarrow I, P) & \Pr(U, P \rightarrow I, P) & \Pr(I, P \rightarrow I, P) \end{bmatrix}$$

Because all cases in Equations 5 - 8 have a  $\frac{1}{N}$  term, we can re-write  $A$  as

$$A = \frac{1}{N}A'$$

512 Unlike  $A$ ,  $A'$  does not depend on  $N$ .

To find  $B$ , we start from the fact that, if a newborn establishes in patch  $q$ , an adult host in the patch has a  $\frac{2}{N} \cdot \frac{m}{m_q}$  chance of dying (since there are  $\frac{N}{2}$  hosts in each of patch M and P). Because the population is comprised almost entirely of residents, the probability that a newborn establishes can be approximated using the probability that a newborn resident establishes. For patch  $q$ , where the other patch is  $q'$ , a host (mutant or resident) with mortality  $m$  has a probability of dying of

$$\Pr(\text{A given host in patch } q \text{ dies}) = \frac{2m}{N\bar{m}_q} \Pr(\text{A newborn resident establishes in } q)$$

where

$$\begin{aligned} \Pr(\text{A newborn resident establishes in } q) = & \\ & \frac{1}{2\bar{f}} [(1-d)(f_{q,U}(1-i_q) + f_{q,I}(1-v)i_q) + d(f_{q',U}(1-i_{q'}) + f_{q',I}(1-v)i_{q'})] \cdot \\ & ((1-hi_q)s_{q,U} + hi_qs_{q,I}) + ((1-d)f_{q,I}vi_q + df_{q',I}vi_{q'})s_{q,I} \equiv \\ & \frac{1}{2}b_q \quad (9) \end{aligned}$$

513 The  $\frac{1}{2}$  in the probability a resident establishes is due to the fact that each patch represents  
 514 only half of the population and thus has its probability of reproducing normalized by  $\frac{1}{2f}$ .  
 515 We separate it out from the rest of the expression ( $b_q$ ) to make it easier to deal with  $A - B$   
 516 later. This gives

$$\Pr(\text{A given host in patch } q \text{ dies}) = \frac{m}{Nm_q} b_q \quad (10)$$

We can then write  $B$  as

$$B = \frac{1}{N} \cdot \begin{bmatrix} b_M \frac{m_{M,U}}{m_M} & 0 & 0 & 0 \\ 0 & b_M \frac{m_{M,I}}{m_M} & 0 & 0 \\ 0 & 0 & b_P \frac{m_{P,U}}{m_P} & 0 \\ 0 & 0 & 0 & b_P \frac{m_{P,I}}{m_P} \end{bmatrix}$$

All the nonzero entries of  $B$  have a  $\frac{1}{N}$  term. We can re-write  $B$  in terms of  $\frac{1}{N}$  and  $B'$ , a matrix that does not depend on  $N$ .

$$B = \frac{1}{N} B'$$

Then we can write  $X_t$  as

$$X_t = I + \frac{1}{N} (A' - B')$$

One problem with  $X_t$  is that as  $N \rightarrow \infty$ ,  $X_t \rightarrow I$ . To fix this, we rescale time in units of  $\tau = tN$ . Then the expected number of mutants produced per mutant of each patch and infection status can be written as

$$X_\tau = X_t^N = \left( I + \frac{1}{N} (A' - B') \right)^N$$

517 As the population size goes to infinity, we get the following formula for  $X_\tau$

$$\lim_{N \rightarrow \infty} X_\tau = \lim_{N \rightarrow \infty} \left( I + \frac{1}{N} (A' - B') \right)^N = e^{A' - B'} \quad (11)$$

518 The mutant should invade if the leading eigenvalue of  $X_\tau > 1$  when the resident is  
519 at equilibrium. Assuming mutations in transmission mode are small, we can trace the  
520 evolutionary trajectory of a population by seeing which mutant with similar transmission  
521 rates can invade, and then looking to see what transmission rates allow invasion of that  
522 mutant when it is the resident. Practically, this means finding the derivative of the leading  
523 eigenvalue of  $X_\tau$  at a range of resident transmission rates (a positive derivative means  
524 a mutant with a slightly higher transmission rate can invade, and a negative derivative  
525 means one with a lower transmission rate can invade). We then use these derivatives to  
526 trace the path of transmission mode evolution.

### 527 **A.3 Transmission Mode Evolution - Symbiont Control**

528 When transmission is a symbiont trait, we again investigate the invasion fitness of a mu-  
529 tant with slightly different transmission rates than the resident. We will follow the same  
530 general procedure as for host control. However, since a mutant symbiont should spread  
531 in the population if it can infected more hosts than the resident symbiont, we will track  
532 the number of mutants in units of hosts infected.

Let  $X_t$  be the expected number of hosts infected with mutant symbionts in patches M and P by a mutant symbiont in each patch. The first and second rows of  $X_t$  will give the infections produced in patches M and P, respectively. The columns of  $X_t$  will likewise correspond to the location of the symbiont that produces the new infection.

$$\begin{bmatrix} \# \text{ Hosts infected with mutant in M at } t + 1 \\ \# \text{ Hosts infected with mutant in P at } t + 1 \end{bmatrix} = X_t \begin{bmatrix} \# \text{ Hosts infected with mutant in M at } t \\ \# \text{ Hosts infected with mutant in P at } t \end{bmatrix}$$

We can again define  $X_t = I + A - B$ , where  $A$  is a matrix that gives the probability that



a mutant symbiont produces a new infection in each patch, and  $B$  gives the probability that a host infected with the mutant dies. Because a symbiont can produce an infection via horizontal or vertical transmission, we will write  $A$  as the sum of  $A_v$  and  $A_h$ , the probability a mutant produces a new infection via vertical or horizontal transmission. We can get  $A_v$  from the probability a newborn host is born infected (Equation 1) and the probability a host born infected establishes (Equation 2).

$$A_v = \frac{1}{N\bar{f}} \begin{bmatrix} (1-d)v^* f_{M,I} s_{M,I} & dv^* f_{P,I} s_{M,I} \\ dv^* f_{M,I} s_{P,I} & (1-d)v^* f_{P,I} s_{P,I} \end{bmatrix}$$

Because horizontal transmission is local, infections produced by horizontal transmission can only appear in the same patch as the original mutant symbiont, meaning  $A_h$ 's off-diagonal entries will be 0. Infections produced by horizontal transmission depend both on the mutant's horizontal transmission rate, its chance of being chosen as the newborn's infectious contact ( $\frac{2}{N}$ ), and on the number of incoming symbionts that are uninfected. The probability that a host is born uninfected in turn depends on the resident's vertical transmission rate ( $v$ ). The diagonal entries of  $A_h$  will then be

$$\Pr(\text{Horizontal transmission in } q) = \frac{2}{N\bar{f}} ((1-d)(f_{q,U}(1-i_q) + (1-v)f_{q,I}i_q) + d(f_{q',U}(1-i_{q'}) + (1-v)f_{q',I}i_{q'}))h^* s_{M,I}$$

where  $q$  is the patch the host is arriving in and  $q'$  is the other patch. Then,

$$A_h = \begin{bmatrix} \Pr(\text{Horizontal transmission in } M) & 0 \\ 0 & \Pr(\text{Horizontal transmission in } P) \end{bmatrix}$$

The probability that a mutant symbiont dies depends on the rate of newborn hosts establishing in its patch. This is given by Equation 10, which will be the diagonal entries

of  $B$ . (As in the host case, the off-diagonal entries of  $B$  will be 0.)

$$B = \begin{bmatrix} \text{Pr}(\text{Host in } M \text{ dies}) & 0 \\ 0 & \text{Pr}(\text{Host in } P \text{ dies}) \end{bmatrix}$$

533 We can now see that  $A = A_v + A_h$  and  $B$  have  $\frac{1}{N}$  terms in them. We can re-write  $A$  and  
534  $B$  as  $A = \frac{1}{N}A'$  and  $B = \frac{1}{N}B'$ , where  $A'$  and  $B'$  do not depend on  $N$ . Then the growth rate  
535 of a mutant symbiont in time units of  $\tau = tN$  is  $X_\tau = e^{A'-B'}$  as  $N \rightarrow \infty$ .

536 Again the mutant should invade if the leading eigenvalue of  $X_\tau > 1$  when the resident  
537 is at ecological equilibrium.

## 538 References

539 Erol Akçay. Evolutionary models of mutualism. In Judith L Bronstein, editor, *Mutualism*,  
540 pages 57–76. Oxford University Press, 2015.

541 S. Alizon, A. Hurford, N. Mideo, and M. Van Baalen. Virulence evolution and the  
542 trade-off hypothesis: history, current state of affairs and the future. *Journal of*  
543 *Evolutionary Biology*, 22(2):245–259, February 2009. ISSN 1010061X. doi:  
544 10.1111/j.1420-9101.2008.01658.x. URL  
545 <http://doi.wiley.com/10.1111/j.1420-9101.2008.01658.x>.

546 David M Baker, Jason P Andras, Adán Guillermo Jordán-Garza, and Marilyn L Fogel.  
547 Nitrate competition in a coral symbiosis varies with temperature among  
548 Symbiodinium clades. *The ISME Journal*, 7(6):1248–1251, June 2013. ISSN 1751-7362,  
549 1751-7370. doi: 10.1038/ismej.2013.12. URL  
550 <http://www.nature.com/doifinder/10.1038/ismej.2013.12>.

551 A. Best, S. Webb, A. White, and M. Boots. Host resistance and coevolution in spatially  
552 structured populations. *Proceedings of the Royal Society B: Biological Sciences*, 278(1715):

553 2216–2222, July 2011. ISSN 0962-8452, 1471-2954. doi: 10.1098/rspb.2010.1978. URL  
554 <http://rspb.royalsocietypublishing.org/cgi/doi/10.1098/rspb.2010.1978>.

555 Jeff Bezanson, Alan Edelman, Stefan Karpinski, and Viral B. Shah. Julia: A Fresh  
556 Approach to Numerical Computing. *SIAM Review*, 59(1):65–98, January 2017. ISSN  
557 0036-1445, 1095-7200. doi: 10.1137/141000671. URL  
558 <http://epubs.siam.org/doi/10.1137/141000671>.

559 Roberta Martini Bonaldo, João Paulo Krajewski, and Ivan Sazima. Does the association  
560 of young fishes with jellyfishes protect from predation? A report on a failure case due  
561 to damage to the jellyfish. *Neotropical Ichthyology*, 2(2):103–105, June 2004. ISSN  
562 1679-6225. doi: 10.1590/S1679-62252004000200008.

563 Monika Bright and Silvia Bulgheresi. A complex journey: transmission of microbial  
564 symbionts. *Nature Reviews Microbiology*, 8(3):218–230, March 2010. ISSN 1740-1526,  
565 1740-1534. doi: 10.1038/nrmicro2262. URL  
566 <http://www.nature.com/doi/10.1038/nrmicro2262>.

567 Ulla Carlsson-Granér and Peter H. Thrall. Host resistance and pathogen infectivity in  
568 host populations with varying connectivity: CONNECTIVITY AFFECTS  
569 RESISTANCE AND INFECTIVITY. *Evolution*, 69(4):926–938, April 2015. ISSN  
570 00143820. doi: 10.1111/evo.12631. URL <http://doi.wiley.com/10.1111/evo.12631>.

571 Scott A. Chamberlain, Judith L. Bronstein, and Jennifer A. Rudgers. How context  
572 dependent are species interactions? *Ecology Letters*, 17(7):881–890, July 2014. ISSN  
573 1461023X. doi: 10.1111/ele.12279. URL <http://doi.wiley.com/10.1111/ele.12279>.

574 G. P. Cheplick, K. Clay, and S. Marks. Interactions between infection by endophytic fungi  
575 and nutrient limitation in the grasses *Lolium perenne* and *Festuca arundinacea*. *New*  
576 *Phytologist*, 111(1):89–97, January 1989. ISSN 0028-646X, 1469-8137. doi:

577 10.1111/j.1469-8137.1989.tb04222.x. URL

578 <http://doi.wiley.com/10.1111/j.1469-8137.1989.tb04222.x>.

579 J. H. Daskin and R. A. Alford. Context-dependent symbioses and their potential roles in  
580 wildlife diseases. *Proceedings of the Royal Society B: Biological Sciences*, 279(1733):

581 1457–1465, April 2012. ISSN 0962-8452, 1471-2954. doi: 10.1098/rspb.2011.2276. URL

582 <http://rspb.royalsocietypublishing.org/cgi/doi/10.1098/rspb.2011.2276>.

583 Andrew J. Davitt, Chris Chen, and Jennifer A. Rudgers. Understanding

584 context-dependency in plant-microbe symbiosis: The influence of abiotic and biotic

585 contexts on host fitness and the rate of symbiont transmission. *Environmental and*

586 *Experimental Botany*, 71(2):137–145, June 2011. ISSN 00988472. doi:

587 10.1016/j.envexpbot.2010.11.004. URL

588 <http://linkinghub.elsevier.com/retrieve/pii/S0098847210002431>.

589 Helen E Dunbar, Alex C. C Wilson, Nicole R Ferguson, and Nancy A Moran. Aphid

590 Thermal Tolerance Is Governed by a Point Mutation in Bacterial Symbionts. *PLoS*

591 *Biology*, 5(5):e96, April 2007. ISSN 1545-7885. doi: 10.1371/journal.pbio.0050096. URL

592 <http://dx.plos.org/10.1371/journal.pbio.0050096>.

593 F. Débarre, S. Lion, M. van Baalen, and S. Gandon. Evolution of Host Life-History Traits  
594 in a Spatially Structured Host-Parasite System. *The American Naturalist*, 179(1):52–63,

595 January 2012. ISSN 0003-0147, 1537-5323. doi: 10.1086/663199. URL

596 <http://www.journals.uchicago.edu/doi/10.1086/663199>.

597 Dieter Ebert. The Epidemiology and Evolution of Symbionts with Mixed-Mode

598 Transmission. *Annual Review of Ecology, Evolution, and Systematics*, 44(1):623–643,

599 November 2013. ISSN 1543-592X, 1545-2069. doi:

600 10.1146/annurev-ecolsys-032513-100555. URL

601 <http://www.annualreviews.org/doi/abs/10.1146/annurev-ecolsys-032513-100555>.

- 602 Paul W. Ewald. Transmission Modes and Evolution of the Parasitism-Mutualism  
603 Continuum. *Annals of the New York Academy of Sciences*, 503(1 Endocytobiolo):295–306,  
604 July 1987. ISSN 0077-8923, 1749-6632. doi: 10.1111/j.1749-6632.1987.tb40616.x. URL  
605 <http://doi.wiley.com/10.1111/j.1749-6632.1987.tb40616.x>.
- 606 Amanda K. Gibson, Jukka Jokela, and Curtis M. Lively. Fine-Scale Spatial Covariation  
607 between Infection Prevalence and Susceptibility in a Natural Population. *The American*  
608 *Naturalist*, 188(1):1–14, July 2016. ISSN 0003-0147, 1537-5323. doi: 10.1086/686767.  
609 URL <https://www.journals.uchicago.edu/doi/10.1086/686767>.
- 610 J. Jousimo, A. J. M. Tack, O. Ovaskainen, T. Mononen, H. Susi, C. Tollenaere, and A.-L.  
611 Laine. Ecological and evolutionary effects of fragmentation on infectious disease  
612 dynamics. *Science*, 344(6189):1289–1293, June 2014. ISSN 0036-8075, 1095-9203. doi:  
613 10.1126/science.1253621. URL  
614 <http://www.sciencemag.org/cgi/doi/10.1126/science.1253621>.
- 615 A. C. Krist, J. Jokela, J. Wiehn, and C. M. Lively. Effects of host condition on susceptibility  
616 to infection, parasite developmental rate, and parasite transmission in a  
617 snail-trematode interaction. *Journal of Evolutionary Biology*, 17(1):33–40, January 2004.  
618 ISSN 1010-061X.
- 619 Laurent Lehmann, Charles Mullon, Erol Akçay, and Jeremy Van Cleve. Invasion fitness,  
620 inclusive fitness, and reproductive numbers in heterogeneous populations. *Evolution*,  
621 70(8):1689–1702, August 2016. ISSN 00143820. doi: 10.1111/evo.12980. URL  
622 <http://doi.wiley.com/10.1111/evo.12980>.
- 623 M. Lipsitch, M. A. Nowak, D. Ebert, and R. M. May. The Population Dynamics of  
624 Vertically and Horizontally Transmitted Parasites. *Proceedings of the Royal Society B:*  
625 *Biological Sciences*, 260(1359):321–327, June 1995. ISSN 0962-8452, 1471-2954. doi:

626 10.1098/rspb.1995.0099. URL

627 <http://rspb.royalsocietypublishing.org/cgi/doi/10.1098/rspb.1995.0099>.

628 Curtis M. Lively. The ecology of virulence: Ecology of virulence. *Ecology Letters*, 9(10):

629 1089–1095, October 2006. ISSN 1461023X. doi: 10.1111/j.1461-0248.2006.00969.x. URL

630 <http://doi.wiley.com/10.1111/j.1461-0248.2006.00969.x>.

631 Rachel M. Penczykowski, Spencer R. Hall, David J. Civitello, and Meghan A. Duffy.

632 Habitat structure and ecological drivers of disease. *Limnology and Oceanography*, 59(2):

633 340–348, March 2014. ISSN 00243590. doi: 10.4319/lo.2014.59.2.0340. URL

634 <http://doi.wiley.com/10.4319/lo.2014.59.2.0340>.

635 R Core Team. *R: A Language and Environment for Statistical Computing*. R Foundation for

636 Statistical Computing, Vienna, Austria, 2017. URL <https://www.R-project.org/>.

637 L. A Real and R. Biek. Spatial dynamics and genetics of infectious diseases on

638 heterogeneous landscapes. *Journal of The Royal Society Interface*, 4(16):935–948, October

639 2007. ISSN 1742-5689, 1742-5662. doi: 10.1098/rsif.2007.1041. URL

640 <http://rsif.royalsocietypublishing.org/cgi/doi/10.1098/rsif.2007.1041>.

641 Koich Saeki and Akira Sasaki. The role of spatial heterogeneity in the evolution of local

642 and global infections of viruses. *PLOS Computational Biology*, 14(1):e1005952, January

643 2018. ISSN 1553-7358. doi: 10.1371/journal.pcbi.1005952. URL

644 <http://dx.plos.org/10.1371/journal.pcbi.1005952>.

645 Jason W. Shapiro and Paul E. Turner. The impact of transmission mode on the evolution

646 of benefits provided by microbial symbionts. *Ecology and Evolution*, 4(17):3350–3361,

647 September 2014. ISSN 20457758. doi: 10.1002/ece3.1166. URL

648 <http://doi.wiley.com/10.1002/ece3.1166>.

649 N. G. Smith. The advantage of being parasitized. *Nature*, 219(5155):690–694, August

650 1968. ISSN 0028-0836.

- 651 Aurélien Tellier and James KM Brown. Spatial heterogeneity, frequency-dependent  
652 selection and polymorphism in host-parasite interactions. *BMC Evolutionary Biology*,  
653 11(1):319, 2011. ISSN 1471-2148. doi: 10.1186/1471-2148-11-319. URL  
654 <http://bmcevolbiol.biomedcentral.com/articles/10.1186/1471-2148-11-319>.
- 655 F Thomas, R Poulin, J-F Guégan, Y Michalakis, and F Renaud. Are there Pros as well as  
656 Cons to being Parasitized? *Parasitology Today*, 16(12):533–536, December 2000. ISSN  
657 01694758. doi: 10.1016/S0169-4758(00)01790-7. URL  
658 <http://linkinghub.elsevier.com/retrieve/pii/S0169475800017907>.
- 659 P. H. Thrall and J. J. Burdon. Effect of resistance variation in a natural plant  
660 host-pathogen metapopulation on disease dynamics. *Plant Pathology*, 49(6):767–773,  
661 December 2000. ISSN 0032-0862, 1365-3059. doi: 10.1046/j.1365-3059.2000.00523.x.  
662 URL <http://doi.wiley.com/10.1046/j.1365-3059.2000.00523.x>.
- 663 John H. Werren, Laura Baldo, and Michael E. Clark. Wolbachia: master manipulators of  
664 invertebrate biology. *Nature Reviews Microbiology*, 6(10):741–751, October 2008. ISSN  
665 1740-1526, 1740-1534. doi: 10.1038/nrmicro1969. URL  
666 <http://www.nature.com/doi/10.1038/nrmicro1969>.
- 667 Hadley Wickham. The Split-Apply-Combine Strategy for Data Analysis. *Journal of*  
668 *Statistical Software*, 40(1):1–29, 2011. URL <http://www.jstatsoft.org/v40/i01/>.
- 669 Wolfram Research Inc. *Mathematica, Version 11.1*. Champaign, IL, 2017.
- 670 Norio Yamamura. Vertical Transmission and Evolution of Mutualism from Parasitism.  
671 *Theoretical Population Biology*, 44(1):95–109, August 1993. doi: 10.1006/tpbi.1993.1020.
